# Supplementary material for: An Optimization Model to Address Overcrowding in Emergency Departments Using Patient Transfer
Source: Hindawi journal article supplement (doi:10.1155/2021/7120291), 2021-08-23
Supplement: f1 [file 7120291.f1.docx]

**Appendix A. Table of Fractional Factorial Designs**

| Runs | Factors | | | | | | | | | |
| --- | --- | --- | --- | --- | --- | --- | --- | --- | --- | --- |
|  |  |  |  |  |  |  |  |  |  |  |
| 1 | 20 | 0 | 0 | 10 | 4 | 0 | 0.65 | 3360 | 9 | 10 |
| 2 | 20 | 0 | 0 | 0 | 0 | 0 | 0.65 | 3360 | 9 | 1 |
| 3 | 20 | 0 | 0 | 10 | 0 | 0 | 0.36 | 1920 | 1 | 10 |
| 4 | 20 | 60 | 0 | 0 | 0 | 0.5 | 0.36 | 3360 | 1 | 10 |
| 5 | 20 | 0 | 4 | 10 | 4 | 0.5 | 0.65 | 1920 | 1 | 10 |
| 6 | 20 | 60 | 4 | 0 | 0 | 0 | 0.65 | 3360 | 9 | 10 |
| 7 | 20 | 60 | 4 | 0 | 4 | 0.5 | 0.36 | 1920 | 1 | 1 |
| 8 | 0 | 60 | 0 | 10 | 0 | 0 | 0.36 | 1920 | 9 | 1 |
| 9 | 0 | 0 | 4 | 10 | 0 | 0 | 0.65 | 3360 | 9 | 10 |
| 10 | 20 | 60 | 0 | 10 | 4 | 0.5 | 0.36 | 3360 | 1 | 1 |
| 11 | 0 | 60 | 0 | 10 | 0 | 0 | 0.65 | 3360 | 9 | 1 |
| 12 | 20 | 60 | 0 | 10 | 4 | 0 | 0.36 | 3360 | 1 | 10 |
| 13 | 0 | 0 | 4 | 0 | 0 | 0.5 | 0.65 | 3360 | 1 | 10 |
| 14 | 0 | 0 | 0 | 0 | 4 | 0.5 | 0.36 | 3360 | 1 | 1 |
| 15 | 0 | 0 | 0 | 0 | 4 | 0 | 0.36 | 3360 | 1 | 10 |
| 16 | 0 | 60 | 0 | 0 | 0 | 0 | 0.36 | 1920 | 1 | 10 |
| 17 | 20 | 60 | 4 | 10 | 4 | 0 | 0.65 | 3360 | 9 | 1 |
| 18 | 0 | 60 | 0 | 0 | 4 | 0.5 | 0.36 | 1920 | 9 | 1 |
| 19 | 20 | 0 | 0 | 10 | 4 | 0 | 0.65 | 3360 | 9 | 10 |
| 20 | 20 | 0 | 0 | 0 | 0 | 0 | 0.65 | 3360 | 9 | 1 |
| 21 | 20 | 0 | 0 | 10 | 0 | 0 | 0.36 | 1920 | 1 | 10 |
| 22 | 20 | 60 | 0 | 0 | 0 | 0.5 | 0.36 | 3360 | 1 | 10 |
| 23 | 20 | 0 | 4 | 10 | 4 | 0.5 | 0.65 | 1920 | 1 | 10 |
| 24 | 20 | 60 | 4 | 0 | 0 | 0 | 0.65 | 3360 | 9 | 10 |
| 25 | 20 | 60 | 4 | 0 | 4 | 0.5 | 0.36 | 1920 | 1 | 1 |
| 26 | 0 | 60 | 0 | 10 | 0 | 0 | 0.36 | 1920 | 9 | 1 |
| 27 | 0 | 0 | 4 | 10 | 0 | 0 | 0.65 | 3360 | 9 | 10 |
| 28 | 20 | 60 | 0 | 10 | 4 | 0.5 | 0.36 | 3360 | 1 | 1 |
| 29 | 0 | 60 | 0 | 10 | 0 | 0 | 0.65 | 3360 | 9 | 1 |
| 30 | 20 | 60 | 0 | 10 | 4 | 0 | 0.36 | 3360 | 1 | 10 |
| 31 | 0 | 0 | 4 | 0 | 0 | 0.5 | 0.65 | 3360 | 1 | 10 |
| 32 | 0 | 0 | 0 | 0 | 4 | 0.5 | 0.36 | 3360 | 1 | 1 |
| 33 | 0 | 0 | 0 | 0 | 4 | 0 | 0.36 | 3360 | 1 | 10 |
| 34 | 0 | 60 | 0 | 0 | 0 | 0 | 0.36 | 1920 | 1 | 10 |
| 35 | 20 | 60 | 4 | 10 | 4 | 0 | 0.65 | 3360 | 9 | 1 |
| 36 | 0 | 60 | 0 | 0 | 4 | 0.5 | 0.36 | 1920 | 9 | 1 |
| 37 | 20 | 0 | 0 | 10 | 4 | 0 | 0.65 | 3360 | 9 | 10 |
| 38 | 20 | 0 | 0 | 0 | 0 | 0 | 0.65 | 3360 | 9 | 1 |
| 39 | 20 | 0 | 0 | 10 | 0 | 0 | 0.36 | 1920 | 1 | 10 |
| 40 | 20 | 60 | 0 | 0 | 0 | 0.5 | 0.36 | 3360 | 1 | 10 |
| 41 | 20 | 0 | 4 | 10 | 4 | 0.5 | 0.65 | 1920 | 1 | 10 |
| 42 | 20 | 60 | 4 | 0 | 0 | 0 | 0.65 | 3360 | 9 | 10 |
| 43 | 20 | 60 | 4 | 0 | 4 | 0.5 | 0.36 | 1920 | 1 | 1 |
| 44 | 0 | 60 | 0 | 10 | 0 | 0 | 0.36 | 1920 | 9 | 1 |
| 45 | 0 | 0 | 4 | 10 | 0 | 0 | 0.65 | 3360 | 9 | 10 |
| 46 | 20 | 60 | 0 | 10 | 4 | 0.5 | 0.36 | 3360 | 1 | 1 |
| 47 | 0 | 60 | 0 | 10 | 0 | 0 | 0.65 | 3360 | 9 | 1 |
| 48 | 20 | 60 | 0 | 10 | 4 | 0 | 0.36 | 3360 | 1 | 10 |
| 49 | 0 | 0 | 4 | 0 | 0 | 0.5 | 0.65 | 3360 | 1 | 10 |
| 50 | 0 | 0 | 0 | 0 | 4 | 0.5 | 0.36 | 3360 | 1 | 1 |
| 51 | 0 | 0 | 0 | 0 | 4 | 0 | 0.36 | 3360 | 1 | 10 |
| 52 | 0 | 60 | 0 | 0 | 0 | 0 | 0.36 | 1920 | 1 | 10 |
| 53 | 20 | 60 | 4 | 10 | 4 | 0 | 0.65 | 3360 | 9 | 1 |
| 54 | 0 | 60 | 0 | 0 | 4 | 0.5 | 0.36 | 1920 | 9 | 1 |
| 55 | 20 | 0 | 0 | 10 | 4 | 0 | 0.65 | 3360 | 9 | 10 |
| 56 | 20 | 0 | 0 | 0 | 0 | 0 | 0.65 | 3360 | 9 | 1 |
| 57 | 20 | 0 | 0 | 10 | 0 | 0 | 0.36 | 1920 | 1 | 10 |
| 58 | 20 | 60 | 0 | 0 | 0 | 0.5 | 0.36 | 3360 | 1 | 10 |
| 59 | 20 | 60 | 0 | 10 | 4 | 0.5 | 0.65 | 1920 | 1 | 1 |
| 60 | 20 | 0 | 4 | 10 | 0 | 0.5 | 0.36 | 3360 | 9 | 10 |
| 61 | 0 | 60 | 0 | 0 | 4 | 0 | 0.36 | 1920 | 9 | 10 |
| 62 | 20 | 60 | 4 | 0 | 0 | 0.5 | 0.65 | 3360 | 9 | 1 |
| 63 | 20 | 0 | 0 | 10 | 4 | 0.5 | 0.36 | 1920 | 9 | 1 |
| 64 | 0 | 60 | 0 | 0 | 4 | 0 | 0.65 | 3360 | 9 | 10 |
| 65 | 0 | 0 | 0 | 10 | 4 | 0.5 | 0.65 | 1920 | 9 | 10 |
| 66 | 20 | 0 | 0 | 0 | 4 | 0 | 0.36 | 1920 | 1 | 1 |
| 67 | 0 | 0 | 4 | 10 | 0 | 0.5 | 0.36 | 1920 | 9 | 1 |
| 68 | 0 | 60 | 4 | 0 | 4 | 0.5 | 0.65 | 1920 | 1 | 10 |
| 69 | 0 | 60 | 4 | 0 | 0 | 0 | 0.65 | 1920 | 9 | 1 |
| 70 | 0 | 0 | 0 | 10 | 0 | 0.5 | 0.36 | 3360 | 1 | 10 |
| 71 | 0 | 0 | 0 | 10 | 0 | 0.5 | 0.65 | 1920 | 1 | 10 |
| 72 | 0 | 0 | 4 | 10 | 4 | 0 | 0.36 | 1920 | 1 | 10 |
| 73 | 0 | 0 | 0 | 10 | 0 | 0 | 0.65 | 1920 | 1 | 1 |
| 74 | 20 | 0 | 4 | 0 | 0 | 0 | 0.65 | 1920 | 1 | 10 |
| 75 | 20 | 60 | 0 | 10 | 0 | 0 | 0.65 | 1920 | 9 | 10 |
| 76 | 0 | 0 | 0 | 0 | 4 | 0 | 0.65 | 1920 | 1 | 10 |
| 77 | 0 | 60 | 4 | 0 | 4 | 0 | 0.65 | 1920 | 1 | 1 |
| 78 | 20 | 0 | 4 | 0 | 4 | 0 | 0.65 | 1920 | 9 | 10 |
| 79 | 0 | 60 | 4 | 10 | 4 | 0 | 0.65 | 1920 | 9 | 10 |
| 80 | 0 | 0 | 4 | 0 | 4 | 0.5 | 0.36 | 1920 | 9 | 10 |
| 81 | 0 | 0 | 4 | 0 | 4 | 0 | 0.65 | 3360 | 9 | 1 |
| 82 | 20 | 0 | 4 | 0 | 0 | 0.5 | 0.65 | 1920 | 1 | 1 |
| 83 | 20 | 0 | 0 | 10 | 0 | 0.5 | 0.36 | 1920 | 1 | 1 |
| 84 | 20 | 60 | 0 | 10 | 0 | 0.5 | 0.36 | 3360 | 9 | 1 |
| 85 | 0 | 60 | 0 | 10 | 4 | 0 | 0.36 | 1920 | 1 | 1 |
| 86 | 20 | 0 | 0 | 0 | 0 | 0 | 0.36 | 1920 | 9 | 1 |
| 87 | 20 | 60 | 4 | 10 | 0 | 0 | 0.36 | 1920 | 1 | 1 |
| 88 | 20 | 0 | 4 | 0 | 0 | 0 | 0.36 | 3360 | 1 | 10 |
| 89 | 20 | 0 | 4 | 10 | 0 | 0 | 0.65 | 1920 | 9 | 1 |
| 90 | 0 | 60 | 0 | 0 | 0 | 0.5 | 0.36 | 1920 | 1 | 1 |
| 91 | 0 | 60 | 0 | 10 | 4 | 0.5 | 0.36 | 1920 | 1 | 10 |
| 92 | 20 | 60 | 4 | 0 | 0 | 0.5 | 0.36 | 1920 | 9 | 1 |
| 93 | 0 | 0 | 0 | 0 | 0 | 0 | 0.65 | 1920 | 9 | 10 |
| 94 | 0 | 60 | 4 | 10 | 0 | 0.5 | 0.36 | 3360 | 1 | 1 |
| 95 | 0 | 0 | 4 | 10 | 4 | 0.5 | 0.36 | 1920 | 1 | 1 |
| 96 | 20 | 60 | 4 | 0 | 0 | 0 | 0.36 | 1920 | 9 | 10 |
| 97 | 20 | 0 | 0 | 0 | 4 | 0.5 | 0.36 | 1920 | 1 | 10 |
| 98 | 0 | 0 | 0 | 10 | 4 | 0.5 | 0.36 | 3360 | 9 | 10 |
| 99 | 20 | 0 | 0 | 10 | 4 | 0.5 | 0.65 | 3360 | 9 | 1 |
| 100 | 20 | 0 | 0 | 0 | 4 | 0.5 | 0.65 | 3360 | 1 | 10 |
| 101 | 20 | 60 | 0 | 0 | 4 | 0 | 0.65 | 1920 | 9 | 1 |
| 102 | 0 | 60 | 0 | 10 | 0 | 0.5 | 0.65 | 3360 | 9 | 10 |
| 103 | 0 | 60 | 4 | 10 | 0 | 0.5 | 0.65 | 1920 | 1 | 1 |
| 104 | 0 | 0 | 4 | 0 | 0 | 0 | 0.36 | 1920 | 1 | 1 |
| 105 | 0 | 60 | 4 | 0 | 4 | 0.5 | 0.36 | 3360 | 1 | 10 |
| 106 | 20 | 60 | 4 | 0 | 4 | 0 | 0.65 | 3360 | 1 | 10 |
| 107 | 20 | 0 | 4 | 0 | 4 | 0 | 0.36 | 3360 | 9 | 10 |
| 108 | 0 | 0 | 4 | 10 | 4 | 0.5 | 0.65 | 3360 | 1 | 1 |
| 109 | 0 | 0 | 0 | 0 | 4 | 0.5 | 0.65 | 1920 | 1 | 1 |
| 110 | 0 | 0 | 4 | 10 | 4 | 0 | 0.65 | 3360 | 1 | 10 |
| 111 | 0 | 0 | 0 | 0 | 0 | 0.5 | 0.65 | 1920 | 9 | 1 |
| 112 | 20 | 0 | 0 | 10 | 4 | 0 | 0.36 | 1920 | 9 | 10 |
| 113 | 20 | 0 | 0 | 10 | 0 | 0 | 0.65 | 3360 | 1 | 10 |
| 114 | 0 | 0 | 4 | 0 | 4 | 0.5 | 0.65 | 3360 | 9 | 10 |
| 115 | 20 | 0 | 4 | 10 | 0 | 0.5 | 0.65 | 1920 | 9 | 10 |
| 116 | 20 | 60 | 4 | 10 | 4 | 0 | 0.36 | 1920 | 9 | 1 |
| 117 | 20 | 0 | 0 | 0 | 0 | 0.5 | 0.36 | 1920 | 9 | 10 |
| 118 | 0 | 0 | 4 | 0 | 4 | 0 | 0.36 | 1920 | 9 | 1 |
| 119 | 20 | 0 | 4 | 10 | 4 | 0 | 0.36 | 3360 | 1 | 1 |
| 120 | 20 | 60 | 4 | 10 | 4 | 0.5 | 0.65 | 3360 | 9 | 10 |
| 121 | 0 | 60 | 0 | 0 | 0 | 0.5 | 0.65 | 3360 | 1 | 1 |
| 122 | 20 | 60 | 4 | 10 | 0 | 0 | 0.65 | 3360 | 1 | 1 |
| 123 | 0 | 60 | 4 | 10 | 0 | 0 | 0.36 | 3360 | 1 | 10 |
| 124 | 0 | 60 | 4 | 0 | 4 | 0 | 0.36 | 3360 | 1 | 1 |
| 125 | 0 | 60 | 4 | 0 | 0 | 0 | 0.36 | 3360 | 9 | 1 |
| 126 | 0 | 60 | 4 | 10 | 4 | 0 | 0.36 | 3360 | 9 | 10 |
| 127 | 20 | 0 | 0 | 10 | 0 | 0.5 | 0.65 | 3360 | 1 | 1 |
| 128 | 20 | 0 | 4 | 0 | 4 | 0.5 | 0.65 | 1920 | 9 | 1 |

Appendix B. Table of Responses for Fractional Factorial Designs

| Runs | Responses | | | | | | | |
| --- | --- | --- | --- | --- | --- | --- | --- | --- |
|  |  |  |  |  |  |  |  |  |
| 1 | 56 | 0.00 | 0.0 | 0.00 | 0.00 | 0.64 | 0.00 | 4.20 |
| 2 | 56 | 0.00 | 0.0 | 0.00 | 0.00 | 0.64 | 0.00 | 4.20 |
| 3 | 56 | 0.01 | 0.1 | 0.01 | 0.01 | 0.76 | 0.00 | 4.20 |
| 4 | 20 | 0.56 | 3.0 | 0.56 | 0.56 | 0.88 | 4.66 | 0.00 |
| 5 | 56 | 0.00 | 0.0 | 0.00 | 0.14 | 0.60 | 0.00 | 4.20 |
| 6 | 24 | 2.13 | 1.1 | 0.24 | 0.24 | 0.88 | 5.27 | 0.00 |
| 7 | 20 | 0.10 | 0.5 | 0.10 | 0.42 | 0.76 | 0.00 | 3.40 |
| 8 | 32 | 2.48 | 0.3 | 0.28 | 0.28 | 0.88 | 0.00 | 0.00 |
| 9 | 56 | 0.00 | 0.0 | 0.00 | 0.00 | 0.64 | 0.00 | 4.20 |
| 10 | 20 | 0.10 | 0.5 | 0.10 | 0.42 | 0.76 | 0.00 | 3.40 |
| 11 | 20 | 0.51 | 0.0 | 0.06 | 0.06 | 0.76 | 0.12 | 0.00 |
| 12 | 20 | 0.56 | 3.0 | 0.56 | 0.56 | 0.88 | 4.66 | 0.00 |
| 13 | 56 | 0.00 | 0.0 | 0.00 | 0.14 | 0.60 | 0.00 | 4.20 |
| 14 | 56 | 0.00 | 0.0 | 0.00 | 0.34 | 0.60 | 0.00 | 4.20 |
| 15 | 56 | 0.01 | 0.1 | 0.01 | 0.01 | 0.76 | 0.00 | 4.20 |
| 16 | 20 | 0.56 | 3.0 | 0.56 | 0.56 | 0.88 | 4.66 | 0.00 |
| 17 | 20 | 0.51 | 0.0 | 0.06 | 0.06 | 0.76 | 0.12 | 0.00 |
| 18 | 32 | 2.48 | 0.2 | 0.28 | 0.28 | 0.88 | 0.12 | 0.00 |
| 19 | 20 | 0.89 | 0.1 | 0.10 | 0.12 | 0.80 | 0.00 | 0.40 |
| 20 | 20 | 0.56 | 3.0 | 0.56 | 0.56 | 0.88 | 4.66 | 0.00 |
| 21 | 20 | 0.00 | 0.0 | 0.00 | 0.34 | 0.60 | 0.00 | 4.20 |
| 22 | 56 | 0.01 | 0.1 | 0.01 | 0.14 | 0.76 | 0.00 | 4.20 |
| 23 | 20 | 2.77 | 0.8 | 0.31 | 0.31 | 0.88 | 7.56 | 0.00 |
| 24 | 56 | 0.00 | 0.0 | 0.00 | 0.15 | 0.60 | 0.00 | 4.20 |
| 25 | 56 | 2.43 | 2.6 | 0.27 | 0.27 | 0.92 | 0.45 | 0.00 |
| 26 | 20 | 0.56 | 2.9 | 0.56 | 0.56 | 0.88 | 0.00 | 4.20 |
| 27 | 32 | 2.48 | 0.3 | 0.28 | 0.28 | 0.88 | 8.86 | 0.00 |
| 28 | 44 | 0.37 | 0.6 | 0.04 | 0.13 | 0.84 | 0.00 | 4.20 |
| 29 | 56 | 0.01 | 0.1 | 0.01 | 0.14 | 0.76 | 0.00 | 4.20 |
| 30 | 20 | 0.00 | 0.0 | 0.00 | 0.00 | 0.60 | 0.00 | 4.20 |
| 31 | 56 | 2.43 | 1.4 | 0.27 | 0.42 | 0.92 | 0.00 | 4.20 |
| 32 | 32 | 2.48 | 0.3 | 0.28 | 0.28 | 0.88 | 8.86 | 0.00 |
| 33 | 56 | 0.97 | 0.9 | 0.11 | 0.11 | 0.88 | 1.26 | 0.00 |
| 34 | 32 | 2.48 | 0.3 | 0.28 | 0.28 | 0.88 | 8.86 | 0.00 |
| 35 | 20 | 0.00 | 0.0 | 0.00 | 0.00 | 0.60 | 0.00 | 4.20 |
| 36 | 20 | 0.31 | 3.2 | 0.31 | 0.31 | 0.88 | 0.00 | 0.42 |
| 37 | 32 | 2.48 | 0.3 | 0.28 | 0.28 | 0.88 | 0.00 | 0.00 |
| 38 | 20 | 0.56 | 3.0 | 0.56 | 0.56 | 0.88 | 4.66 | 0.00 |
| 39 | 56 | 0.00 | 0.0 | 0.00 | 0.34 | 0.60 | 0.00 | 4.20 |
| 40 | 32 | 2.48 | 0.2 | 0.28 | 0.28 | 0.88 | 0.12 | 0.00 |
| 41 | 56 | 0.02 | 0.0 | 0.00 | 0.00 | 0.72 | 0.00 | 4.20 |
| 42 | 32 | 2.48 | 0.3 | 0.28 | 0.28 | 0.88 | 8.86 | 0.00 |
| 43 | 20 | 1.54 | 0.3 | 0.17 | 0.21 | 0.84 | 0.00 | 0.84 |
| 44 | 20 | 0.31 | 3.2 | 0.31 | 0.33 | 0.88 | 0.00 | 0.42 |
| 45 | 20 | 0.31 | 3.2 | 0.31 | 0.33 | 0.88 | 0.00 | 0.42 |
| 46 | 56 | 0.00 | 0.0 | 0.00 | 0.00 | 0.60 | 0.00 | 4.20 |
| 47 | 24 | 2.13 | 1.1 | 0.24 | 0.24 | 0.88 | 5.27 | 0.00 |
| 48 | 20 | 0.51 | 0.0 | 0.06 | 0.06 | 0.76 | 0.12 | 0.00 |
| 49 | 56 | 0.00 | 0.0 | 0.00 | 0.00 | 0.60 | 0.00 | 4.20 |
| 50 | 56 | 0.02 | 0.0 | 0.00 | 0.15 | 0.72 | 0.00 | 4.20 |
| 51 | 20 | 0.17 | 1.7 | 0.17 | 0.17 | 0.84 | 0.08 | 0.00 |
| 52 | 20 | 0.17 | 1.7 | 0.17 | 0.17 | 0.84 | 0.12 | 0.00 |
| 53 | 32 | 2.48 | 0.3 | 0.28 | 0.28 | 0.88 | 8.86 | 0.00 |
| 54 | 56 | 0.02 | 0.0 | 0.00 | 0.00 | 0.72 | 0.00 | 4.20 |
| 55 | 56 | 0.00 | 0.0 | 0.00 | 0.00 | 0.60 | 0.00 | 4.20 |
| 56 | 56 | 0.00 | 0.0 | 0.00 | 0.00 | 0.60 | 0.00 | 4.20 |
| 57 | 56 | 0.00 | 0.0 | 0.00 | 0.00 | 0.60 | 0.00 | 4.20 |
| 58 | 20 | 0.17 | 1.7 | 0.17 | 0.17 | 0.84 | 0.08 | 0.00 |
| 59 | 20 | 0.00 | 0.0 | 0.00 | 0.34 | 0.60 | 0.00 | 4.20 |
| 60 | 56 | 2.43 | 2.6 | 0.27 | 0.27 | 0.92 | 0.45 | 0.00 |
| 61 | 32 | 2.48 | 0.3 | 0.28 | 0.28 | 0.88 | 8.86 | 0.00 |
| 62 | 20 | 1.54 | 0.3 | 0.17 | 0.21 | 0.84 | 0.00 | 0.84 |
| 63 | 56 | 0.02 | 0.0 | 0.00 | 0.15 | 0.72 | 0.00 | 4.20 |
| 64 | 20 | 2.77 | 0.8 | 0.31 | 0.31 | 0.88 | 7.56 | 0.00 |
| 65 | 56 | 0.00 | 0.0 | 0.00 | 0.09 | 0.64 | 0.00 | 4.20 |
| 66 | 56 | 0.00 | 0.0 | 0.00 | 0.00 | 0.60 | 0.00 | 4.20 |
| 67 | 56 | 0.02 | 0.0 | 0.00 | 0.15 | 0.72 | 0.00 | 4.20 |
| 68 | 20 | 0.17 | 1.7 | 0.17 | 0.17 | 0.84 | 0.12 | 0.00 |
| 69 | 20 | 1.54 | 0.3 | 0.17 | 0.17 | 0.84 | 0.00 | 0.84 |
| 70 | 56 | 0.01 | 0.1 | 0.01 | 0.14 | 0.76 | 0.00 | 4.20 |
| 71 | 56 | 0.00 | 0.0 | 0.00 | 0.14 | 0.60 | 0.00 | 4.20 |
| 72 | 56 | 0.01 | 0.1 | 0.01 | 0.01 | 0.76 | 0.00 | 4.20 |
| 73 | 56 | 0.00 | 0.0 | 0.00 | 0.00 | 0.60 | 0.00 | 4.20 |
| 74 | 56 | 0.00 | 0.0 | 0.00 | 0.00 | 0.60 | 0.00 | 4.20 |
| 75 | 24 | 2.13 | 1.1 | 0.24 | 0.24 | 0.88 | 5.27 | 0.00 |
| 76 | 56 | 0.00 | 0.0 | 0.00 | 0.00 | 0.60 | 0.00 | 4.20 |
| 77 | 20 | 0.00 | 0.0 | 0.00 | 0.00 | 0.60 | 0.00 | 4.20 |
| 78 | 56 | 0.00 | 0.0 | 0.00 | 0.00 | 0.64 | 0.00 | 4.20 |
| 79 | 20 | 0.89 | 0.1 | 0.10 | 0.10 | 0.80 | 8.60 | 0.00 |
| 80 | 56 | 0.97 | 0.9 | 0.11 | 0.11 | 0.88 | 1.26 | 0.00 |
| 81 | 56 | 0.00 | 0.0 | 0.00 | 0.00 | 0.60 | 0.00 | 4.20 |
| 82 | 56 | 0.00 | 0.0 | 0.00 | 0.34 | 0.60 | 0.00 | 4.20 |
| 83 | 56 | 0.00 | 0.0 | 0.00 | 0.34 | 0.60 | 0.00 | 4.20 |
| 84 | 32 | 2.48 | 0.3 | 0.28 | 0.28 | 0.88 | 0.00 | 0.00 |
| 85 | 20 | 0.10 | 0.5 | 0.10 | 0.10 | 0.76 | 0.00 | 3.40 |
| 86 | 56 | 0.02 | 0.0 | 0.00 | 0.00 | 0.72 | 0.00 | 4.20 |
| 87 | 20 | 0.10 | 0.5 | 0.10 | 0.10 | 0.76 | 0.00 | 3.40 |
| 88 | 56 | 0.01 | 0.1 | 0.01 | 0.01 | 0.76 | 0.00 | 4.20 |
| 89 | 56 | 0.00 | 0.0 | 0.00 | 0.00 | 0.60 | 0.00 | 4.20 |
| 90 | 20 | 0.56 | 2.9 | 0.56 | 0.89 | 0.88 | 0.00 | 4.20 |
| 91 | 20 | 0.18 | 0.8 | 0.18 | 0.18 | 0.80 | 5.40 | 0.00 |
| 92 | 32 | 2.48 | 0.3 | 0.28 | 0.28 | 0.88 | 0.00 | 0.00 |
| 93 | 56 | 1.34 | 2.1 | 0.15 | 0.15 | 0.92 | 0.00 | 4.20 |
| 94 | 20 | 0.10 | 0.5 | 0.10 | 0.42 | 0.76 | 0.00 | 3.40 |
| 95 | 56 | 0.00 | 0.0 | 0.00 | 0.34 | 0.60 | 0.00 | 4.20 |
| 96 | 32 | 2.48 | 0.3 | 0.28 | 0.28 | 0.88 | 8.86 | 0.00 |
| 97 | 56 | 0.01 | 0.1 | 0.01 | 0.14 | 0.76 | 0.00 | 4.20 |
| 98 | 56 | 0.97 | 0.9 | 0.11 | 0.11 | 0.88 | 1.26 | 0.00 |
| 99 | 56 | 0.00 | 0.0 | 0.00 | 0.15 | 0.60 | 0.00 | 4.20 |
| 100 | 56 | 0.00 | 0.0 | 0.00 | 0.14 | 0.60 | 0.00 | 4.20 |
| 101 | 20 | 1.54 | 0.3 | 0.17 | 0.17 | 0.84 | 0.00 | 0.84 |
| 102 | 20 | 0.89 | 0.1 | 0.10 | 0.10 | 0.80 | 8.60 | 0.00 |
| 103 | 20 | 0.00 | 0.0 | 0.00 | 0.34 | 0.60 | 0.00 | 4.20 |
| 104 | 56 | 0.00 | 0.0 | 0.00 | 0.00 | 0.60 | 0.00 | 4.20 |
| 105 | 20 | 0.18 | 0.8 | 0.18 | 0.18 | 0.80 | 5.40 | 0.00 |
| 106 | 20 | 0.17 | 1.7 | 0.17 | 0.17 | 0.84 | 0.08 | 0.00 |
| 107 | 56 | 2.43 | 2.6 | 0.27 | 0.27 | 0.92 | 0.45 | 0.00 |
| 108 | 56 | 0.00 | 0.0 | 0.00 | 0.34 | 0.60 | 0.00 | 4.20 |
| 109 | 56 | 0.00 | 0.0 | 0.00 | 0.34 | 0.60 | 0.00 | 4.20 |
| 110 | 56 | 0.00 | 0.0 | 0.00 | 0.00 | 0.60 | 0.00 | 4.20 |
| 111 | 56 | 0.00 | 0.0 | 0.00 | 0.15 | 0.60 | 0.00 | 4.20 |
| 112 | 56 | 0.97 | 0.9 | 0.11 | 0.11 | 0.88 | 1.26 | 0.00 |
| 113 | 56 | 0.00 | 0.0 | 0.00 | 0.00 | 0.60 | 0.00 | 4.20 |
| 114 | 56 | 0.00 | 0.0 | 0.00 | 0.09 | 0.64 | 0.00 | 4.20 |
| 115 | 32 | 2.48 | 0.3 | 0.28 | 0.28 | 0.88 | 0.00 | 0.00 |
| 116 | 56 | 2.43 | 2.6 | 0.27 | 0.27 | 0.92 | 0.45 | 0.00 |
| 117 | 56 | 0.02 | 0.0 | 0.00 | 0.00 | 0.72 | 0.00 | 4.20 |
| 118 | 56 | 0.00 | 0.0 | 0.00 | 0.00 | 0.60 | 0.00 | 4.20 |
| 119 | 24 | 2.13 | 1.1 | 0.24 | 0.24 | 0.88 | 5.27 | 0.00 |
| 120 | 20 | 0.00 | 0.0 | 0.00 | 0.34 | 0.60 | 0.00 | 4.20 |
| 121 | 20 | 0.00 | 0.0 | 0.00 | 0.00 | 0.60 | 0.00 | 4.20 |
| 122 | 20 | 0.18 | 0.8 | 0.18 | 0.18 | 0.80 | 5.24 | 0.00 |
| 123 | 20 | 0.10 | 0.5 | 0.10 | 0.10 | 0.76 | 0.00 | 3.40 |
| 124 | 32 | 2.48 | 0.3 | 0.28 | 0.28 | 0.88 | 0.00 | 0.00 |
| 125 | 32 | 2.48 | 0.3 | 0.28 | 0.28 | 0.88 | 8.86 | 0.00 |
| 126 | 56 | 0.00 | 0.0 | 0.00 | 0.34 | 0.60 | 0.00 | 4.20 |
| 127 | 56 | 0.00 | 0.0 | 0.00 | 0.15 | 0.60 | 0.00 | 4.20 |
| 128 | 32 | 2.48 | 0.3 | 0.28 | 0.28 | 0.88 | 0.00 | 0.00 |

Appendix C. Detailed Statistical Model Outputs for Responses

Table C.1. Significant main effects[[1]](#footnote-1)

| Response | (adj) |  |  |  |  |  |  |  |  |
| --- | --- | --- | --- | --- | --- | --- | --- | --- | --- |
|  | 98.9% | --- | --- | +++ |  |  |  |  |  |
|  | 83.6% | +++ | --- | +++ | +++ |  | --- | - |  |
|  | 54.1% | +++ | - | - | +++ |  | - | -- |  |
|  | 67.2% | +++ | --- | + | +++ |  | -- | - |  |
|  | 71.1% | +++ | --- | -- |  | - | -- | -- | +++ |
|  | 76.4% | +++ | --- | +++ | +++ |  | - |  |  |
|  | 88.9% | +++ | --- | +++ | +++ |  |  |  |  |
|  | 77.5% | --- | +++ | --- | --- |  |  |  |  |

Table C.2. Significant two-way interactions

| Response |  |  |  |  |  |  |  |  |  |  |  |  |
| --- | --- | --- | --- | --- | --- | --- | --- | --- | --- | --- | --- | --- |
|  | --- | +++ |  | --- |  |  |  |  |  |  |  |  |
|  |  | +++ |  | --- |  | +++ | -- |  |  |  |  |  |
|  |  | --- | + |  |  |  |  | ++ |  |  |  |  |
|  | --- |  | ++ |  |  |  |  | + |  |  |  |  |
|  | --- | - | + |  |  | + |  | + | -- | --- | --- | + |
|  | ++ |  |  |  |  | - |  |  |  |  |  |  |
|  | --- | +++ | +++ |  | --- | +++ |  |  |  |  |  |  |
|  | - | - | -- | ++ | + | + |  |  |  |  |  |  |

Considering the main effects presented in Table C.1, parameter is significant at the level for every response, suggesting that all responses are significantly impacted by the cost per unit service capacity. Similarly, parameter is significant at the level for every response except , suggesting that the service rate also has a significant effect on the optimized system’s performance. The external arrival rate parameters were significant for most responses, while the per-patient queueing penalty costs were each significant for approximately one-half of the responses. The waiting time penalty cost and travel time for transfers were only significant for the response expected waiting time in system response . Parameters and were not significant as main effects for any response.

Considering the interaction effects presented in Table C.2, the interaction of parameter (cost per unit service capacity) with each of (service rate) and (arrival rate of emergency patients) is significant at the level for four of the eight responses ( in the case of the interaction, in the case of the interaction), reinforcing the importance of the cost per unit service capacity. The only other interactions that were significant at the level for multiple responses were (for and ) and (for and ), emphasizing the importance of the emergency patient arrival rate on the expected number of emergency patients in queue awaiting service.

Appendix D. Detailed Statistical Model Outputs for Responses

**Response**

Model Summary

| S | R-sq | R-sq(adj) | R-sq(pred) |
| --- | --- | --- | --- |
| 1.80249 | 98.90% | 98.85% | 98.77% |

Coded Coefficients

| Term | Effect | Coef | SE Coef | T-Value | P-Value | VIF |
| --- | --- | --- | --- | --- | --- | --- |
| Constant |  | 39.531 | 0.159 | 248.13 | < 0.001 |  |
|  | -32.563 | -16.281 | 0.159 | -102.19 | < 0.001 | 1.00 |
|  | -2.937 | -1.469 | 0.159 | -9.22 | < 0.001 | 1.00 |
|  | 3.062 | 1.531 | 0.159 | 9.61 | < 0.001 | 1.00 |
| * | -2.562 | -1.281 | 0.159 | -8.04 | < 0.001 | 1.00 |
| * | 3.438 | 1.719 | 0.159 | 10.79 | < 0.001 | 1.00 |
| * | -2.937 | -1.469 | 0.159 | -9.22 | < 0.001 | 1.00 |

Regression Equation in Uncoded Units

|  |  |  |
| --- | --- | --- |


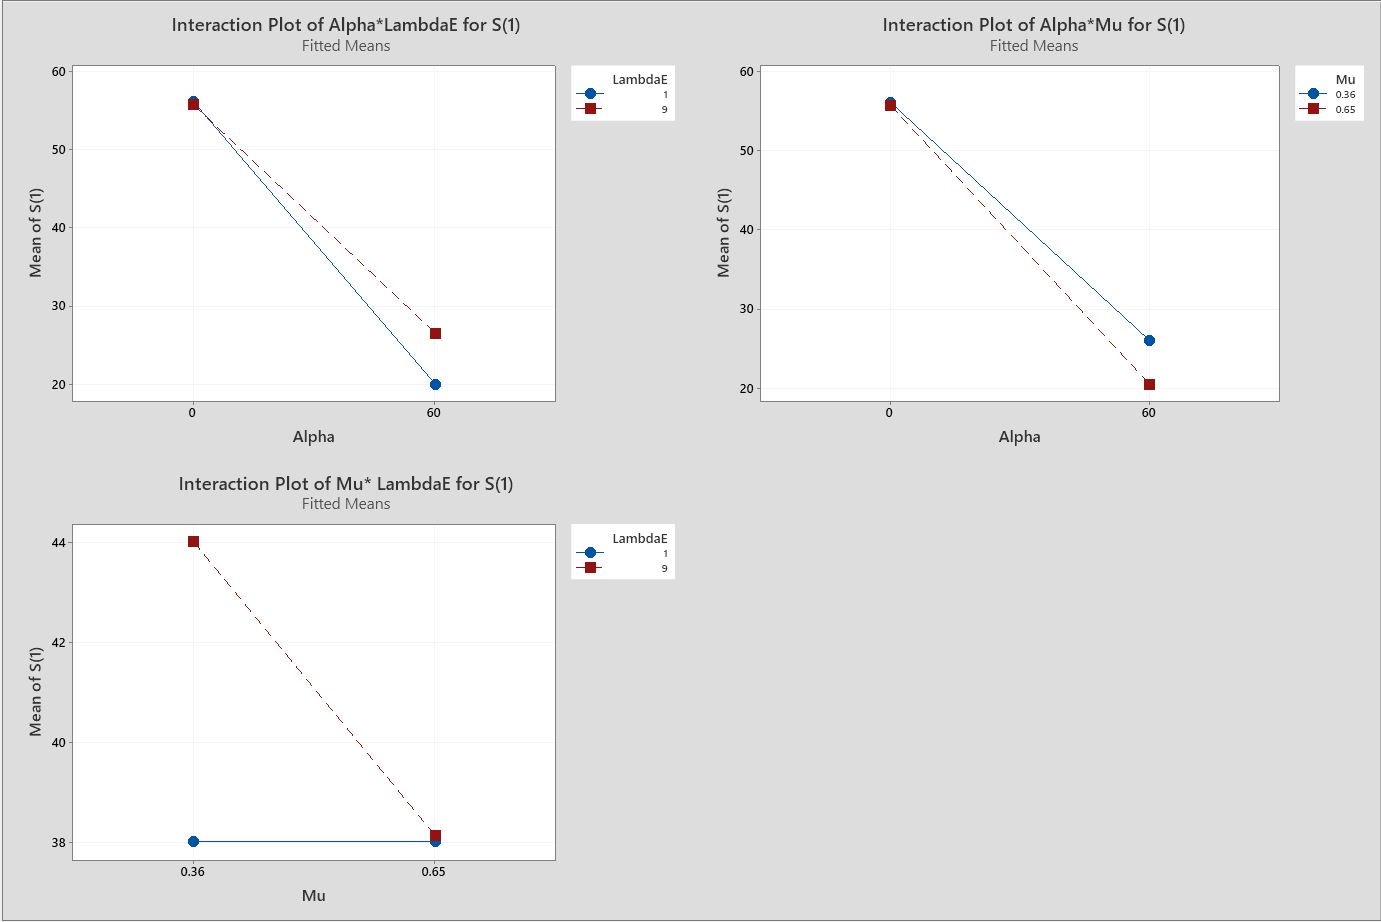


Figure D.1. Significant interaction plots for

**Response**

Model Summary

| S | R-sq | R-sq(adj) | R-sq(pred) |
| --- | --- | --- | --- |
| 0.394826 | 84.88% | 83.59% | 81.90% |

Coded Coefficients

| Term | Effect | Coef | SE Coef | T-Value | P-Value | VIF |
| --- | --- | --- | --- | --- | --- | --- |
| Constant |  | 0.6941 | 0.0349 | 19.89 | < 0.001 |  |
|  | 0.8283 | 0.4141 | 0.0349 | 11.87 | < 0.001 | 1.00 |
|  | -0.2495 | -0.1248 | 0.0349 | -3.58 | 0.001 | 1.00 |
|  | -0.1423 | -0.0711 | 0.0349 | -2.04 | 0.044 | 1.00 |
|  | -0.5150 | -0.2575 | 0.0349 | -7.38 | < 0.001 | 1.00 |
|  | 1.1723 | 0.5862 | 0.0349 | 16.80 | < 0.001 | 1.00 |
|  | 0.3646 | 0.1823 | 0.0349 | 5.22 | < 0.001 | 1.00 |
| * | 0.6158 | 0.3079 | 0.0349 | 8.82 | < 0.001 | 1.00 |
| * | -0.2052 | -0.1026 | 0.0349 | -2.94 | 0.004 | 1.00 |
| * | -0.4128 | -0.2064 | 0.0349 | -5.91 | < 0.001 | 1.00 |
| * | 0.2589 | 0.1295 | 0.0349 | 3.71 | < 0.001 | 1.00 |

Regression Equation in Uncoded Units

|  | =-0.027 + 0.00098  + 0.0007  - 0.0356  + 0.003 + 0.2354 + 0.0045  + 0.002566 - 0.00513 * - 0.3558 + 0.00719 |  |
| --- | --- | --- |

Figure D.2. Significant interaction plots for

**
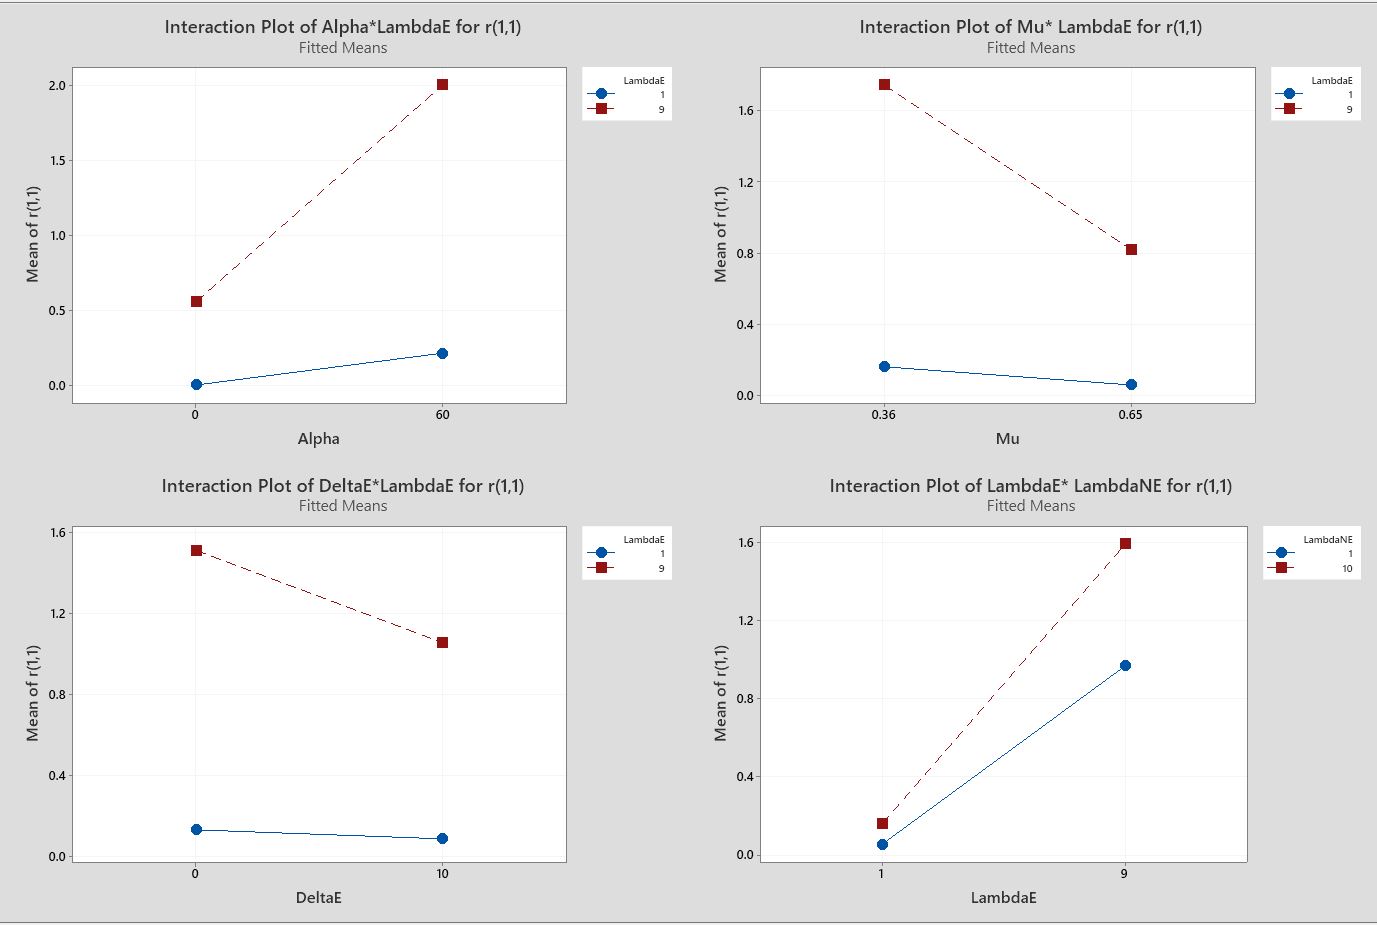
**

**Response**

Model Summary

| S | R-sq | R-sq(adj) | R-sq(pred) |
| --- | --- | --- | --- |
| 0.628683 | 57.73% | 54.11% | 49.40% |

Coded Coefficients

| Term | Effect | Coef | SE Coef | T-Value | P-Value | VIF |
| --- | --- | --- | --- | --- | --- | --- |
| Constant |  | 0.5900 | 0.0556 | 10.62 | < 0.001 |  |
|  | 0.5861 | 0.2930 | 0.0556 | 5.27 | < 0.001 | 1.00 |
|  | -0.1981 | -0.0991 | 0.0556 | -1.78 | 0.077 | 1.00 |
|  | -0.2822 | -0.1411 | 0.0556 | -2.54 | 0.012 | 1.00 |
|  | -0.2984 | -0.1492 | 0.0556 | -2.68 | 0.008 | 1.00 |
|  | -0.2799 | -0.1400 | 0.0556 | -2.52 | 0.013 | 1.00 |
|  | -0.2211 | -0.1105 | 0.0556 | -1.99 | 0.049 | 1.00 |
|  | 0.7473 | 0.3737 | 0.0556 | 6.72 | < 0.001 | 1.00 |
| * | -0.7677 | -0.3839 | 0.0556 | -6.91 | < 0.001 | 1.00 |
| * | 0.2462 | 0.1231 | 0.0556 | 2.22 | 0.029 | 1.00 |
| * | 0.2935 | 0.1468 | 0.0556 | 2.64 | 0.009 | 1.00 |

Regression Equation in Uncoded Units

| = 0.673 + 0.02075  - 0.1229 - 0.0576  - 0.0746  - 0.965 + 0.0683  + 0.0557  - 0.003199 + 0.000912 + 0.01468 |  |  |
| --- | --- | --- |


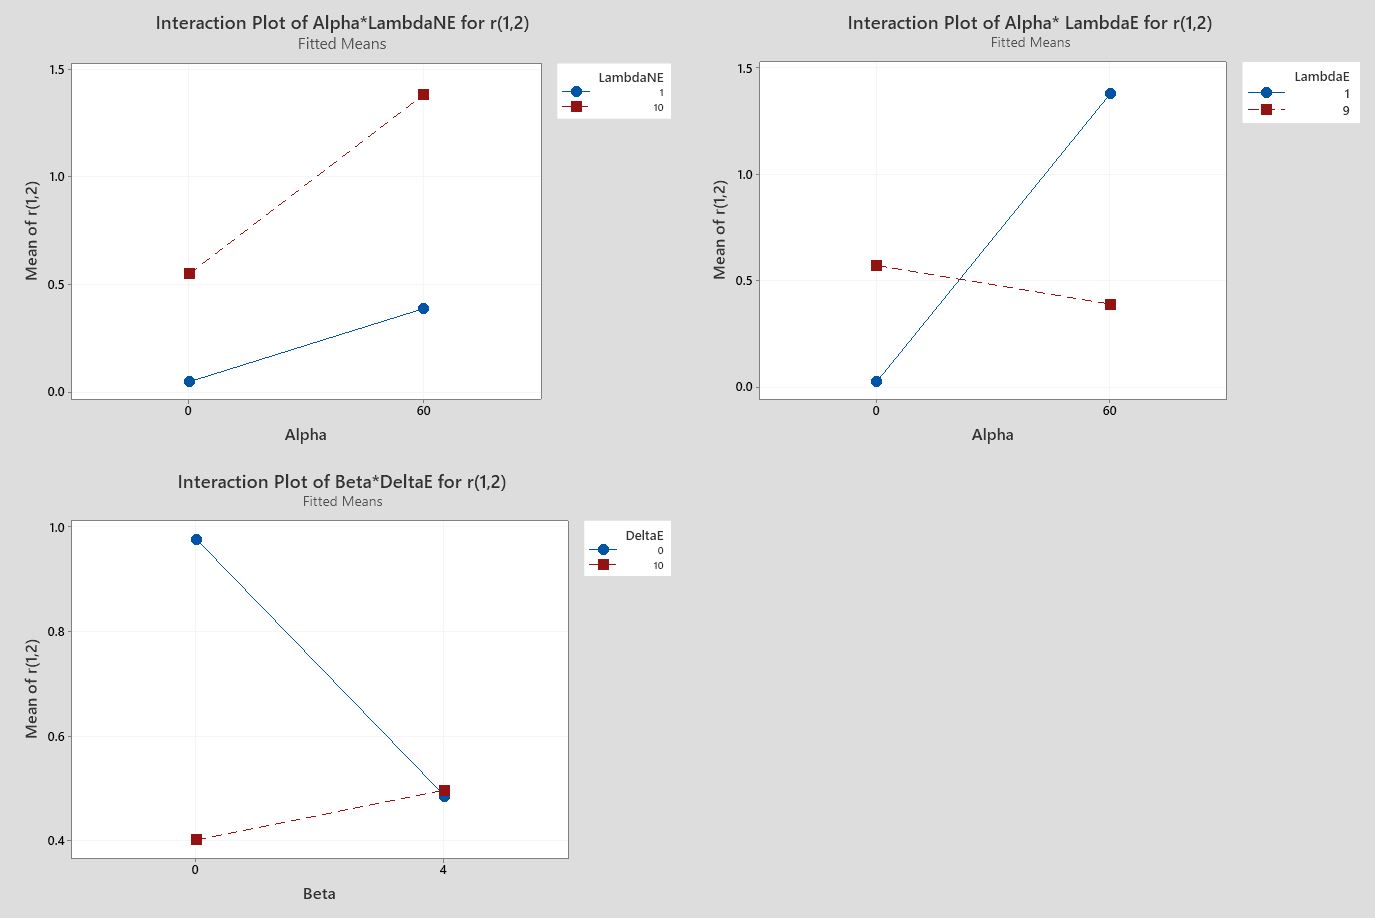


Figure D.3. Significant interaction plots for

**Response**

Model Summary

| S | R-sq | R-sq(adj) | R-sq(pred) |
| --- | --- | --- | --- |
| 0.0874691 | 69.79% | 67.20% | 63.84% |

Coded Coefficients

| Term | Effect | Coef | SE Coef | T-Value | P-Value | VIF |
| --- | --- | --- | --- | --- | --- | --- |
| Constant |  | 0.12509 | 0.00773 | 16.18 | < 0.001 |  |
|  | 0.18647 | 0.09324 | 0.00773 | 12.06 | < 0.001 | 1.00 |
|  | -0.02999 | -0.01499 | 0.00773 | -1.94 | 0.055 | 1.00 |
|  | -0.04745 | -0.02372 | 0.00773 | -3.07 | 0.003 | 1.00 |
|  | -0.03931 | -0.01966 | 0.00773 | -2.54 | 0.012 | 1.00 |
|  | -0.10268 | -0.05134 | 0.00773 | -6.64 | < 0.001 | 1.00 |
|  | 0.03433 | 0.01716 | 0.00773 | 2.22 | 0.028 | 1.00 |
|  | 0.08746 | 0.04373 | 0.00773 | 5.66 | < 0.001 | 1.00 |
|  | -0.05096 | -0.02548 | 0.00773 | -3.30 | 0.001 | 1.00 |
|  | 0.04162 | 0.02081 | 0.00773 | 2.69 | 0.008 | 1.00 |
|  | 0.03801 | 0.01900 | 0.00773 | 2.46 | 0.015 | 1.00 |

Regression Equation in Uncoded Units

0.1498 + 0.005218 0.01700   0.00855

Figure D.4. Significant interaction plots for

**
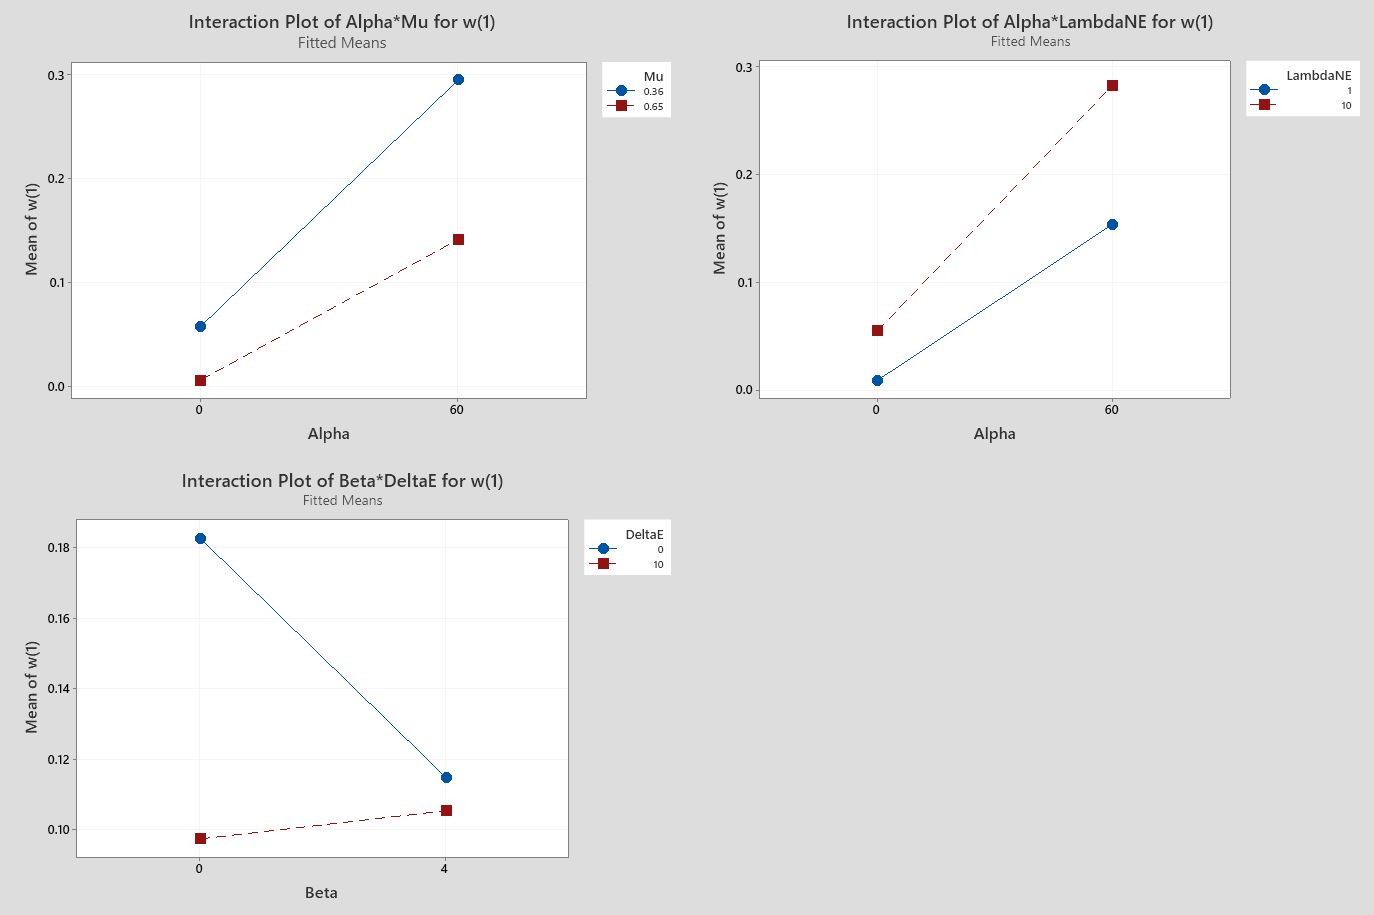
**

**Response**

Model Summary

| S | R-sq | R-sq(adj) | R-sq(pred) |
| --- | --- | --- | --- |
| 0.0866930 | 75.15% | 71.05% | 65.74% |

Coded Coefficients

| Term | Effect | Coef | SE Coef | T-Value | P-Value | VIF |
| --- | --- | --- | --- | --- | --- | --- |
| Constant |  | 0.18861 | 0.00766 | 24.61 | < 0.001 |  |
|  | 0.02225 | 0.01113 | 0.00766 | 1.45 | 0.149 | 1.00 |
|  | 0.14602 | 0.07301 | 0.00766 | 9.53 | < 0.001 | 1.00 |
|  | -0.03066 | -0.01533 | 0.00766 | -2.00 | 0.048 | 1.00 |
|  | -0.04873 | -0.02437 | 0.00766 | -3.18 | 0.002 | 1.00 |
|  | -0.04056 | -0.02028 | 0.00766 | -2.65 | 0.009 | 1.00 |
|  | 0.12642 | 0.06321 | 0.00766 | 8.25 | < 0.001 | 1.00 |
|  | -0.09382 | -0.04691 | 0.00766 | -6.12 | < 0.001 | 1.00 |
|  | -0.04142 | -0.02071 | 0.00766 | -2.70 | 0.008 | 1.00 |
|  | 0.00740 | 0.00370 | 0.00766 | 0.48 | 0.630 | 1.00 |
| * | 0.03588 | 0.01794 | 0.00766 | 2.34 | 0.021 | 1.00 |
| * | -0.04605 | -0.02303 | 0.00766 | -3.01 | 0.003 | 1.00 |
| * | -0.05341 | -0.02670 | 0.00766 | -3.48 | 0.001 | 1.00 |
| * | -0.03084 | -0.01542 | 0.00766 | -2.01 | 0.047 | 1.00 |
| * | 0.03736 | 0.01868 | 0.00766 | 2.44 | 0.016 | 1.00 |
| * | 0.03866 | 0.01933 | 0.00766 | 2.52 | 0.013 | 1.00 |
| * | -0.06884 | -0.03442 | 0.00766 | -4.49 | < 0.001 | 1.00 |
| * | -0.09034 | -0.04517 | 0.00766 | -5.89 | < 0.001 | 1.00 |
| * | 0.03320 | 0.01660 | 0.00766 | 2.17 | 0.032 | 1.00 |

Regression Equation in Uncoded Units

|  | = | 0.1379 - 0.00068 + 0.00618  - 0.01733 - 0.00874  + 0.00210  + 0.000897  - 0.00307 *- 0.00614 * |
| --- | --- | --- |


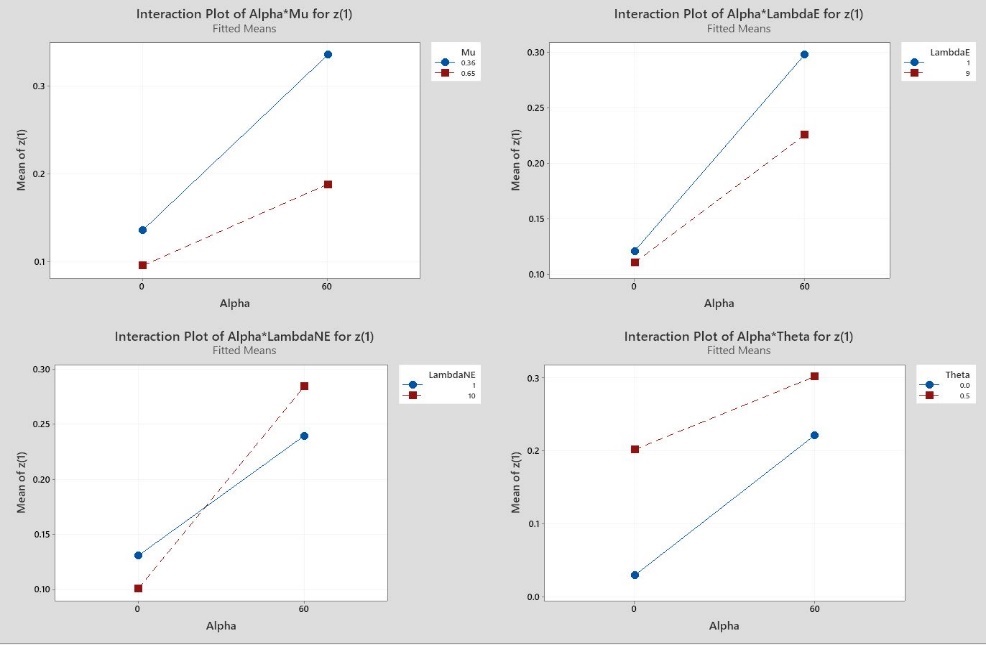

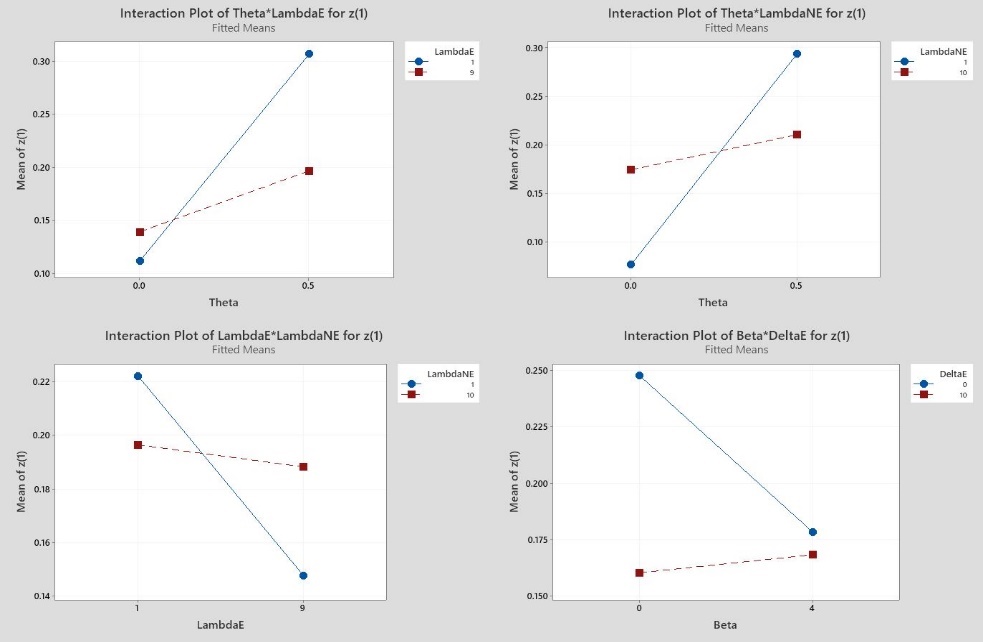

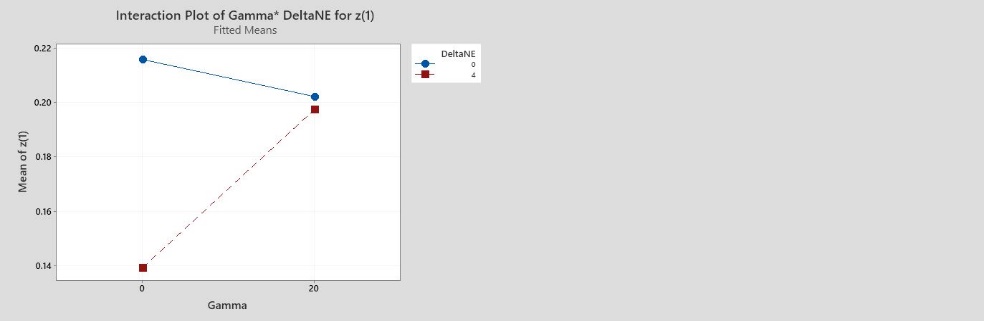


Figure D.5. Significant interaction plots for

**Response**

Model Summary

| S | R-sq | R-sq(adj) | R-sq(pred) |
| --- | --- | --- | --- |
| 0.0585413 | 77.74% | 76.44% | 74.67% |

Coded Coefficients

| Term | Effect | Coef | SE Coef | T-Value | P-Value | VIF |
| --- | --- | --- | --- | --- | --- | --- |
| Constant |  | 0.75187 | 0.00517 | 145.31 | < 0.001 |  |
|  | 0.12625 | 0.06313 | 0.00517 | 12.20 | < 0.001 | 1.00 |
|  | -0.02500 | -0.01250 | 0.00517 | -2.42 | 0.017 | 1.00 |
|  | -0.09750 | -0.04875 | 0.00517 | -9.42 | < 0.001 | 1.00 |
|  | 0.09000 | 0.04500 | 0.00517 | 8.70 | < 0.001 | 1.00 |
|  | 0.09750 | 0.04875 | 0.00517 | 9.42 | < 0.001 | 1.00 |
| * | 0.02750 | 0.01375 | 0.00517 | 2.66 | 0.009 | 1.00 |
| * | -0.02125 | -0.01062 | 0.00517 | -2.05 | 0.042 | 1.00 |

Regression Equation in Uncoded Units

|  |  | = | 0.7869 + 0.000508  - 0.00250  - 0.4310   **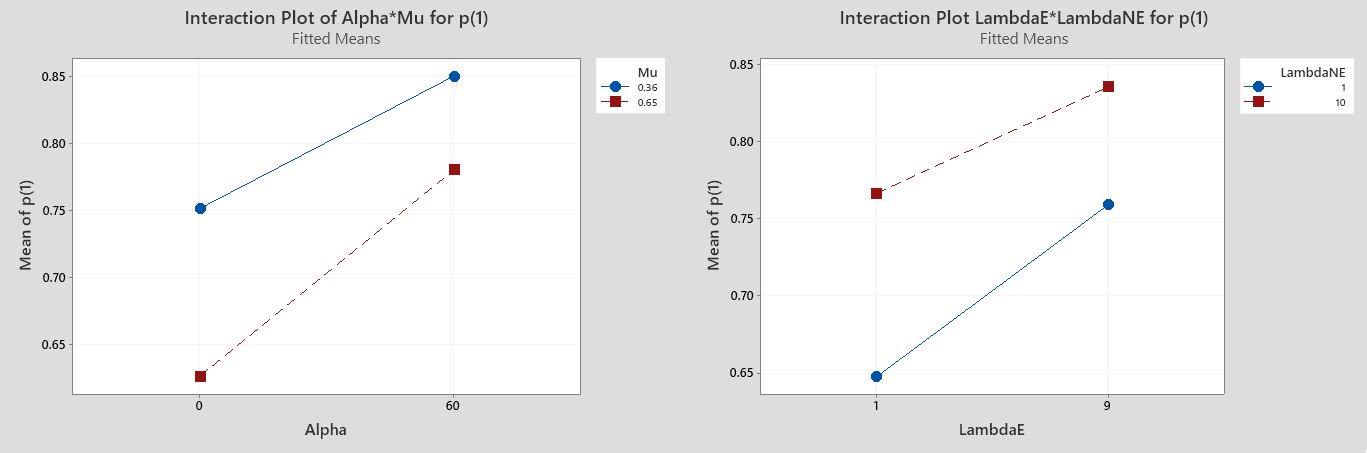** |  |
| --- | --- | --- | --- | --- |

Figure D.6. Significant interaction plots for

**Response**

Model Summary

| S | R-sq | R-sq(adj) | R-sq(pred) |
| --- | --- | --- | --- |
| 0.922728 | 89.68% | 88.89% | 87.86% |

Coded Coefficients

| Term | Effect | Coef | SE Coef | T-Value | P-Value | VIF |
| --- | --- | --- | --- | --- | --- | --- |
| Constant |  | 1.3406 | 0.0816 | 16.44 | < 0.001 |  |
|  | 2.4672 | 1.2336 | 0.0816 | 15.13 | < 0.001 | 1.00 |
|  | -0.9860 | -0.4930 | 0.0816 | -6.04 | < 0.001 | 1.00 |
|  | 1.4362 | 0.7181 | 0.0816 | 8.80 | < 0.001 | 1.00 |
|  | 2.6624 | 1.3312 | 0.0816 | 16.32 | < 0.001 | 1.00 |
| * | -0.7719 | -0.3860 | 0.0816 | -4.73 | < 0.001 | 1.00 |
| * | 1.2221 | 0.6111 | 0.0816 | 7.49 | < 0.001 | 1.00 |
| * | 2.4484 | 1.2242 | 0.0816 | 15.01 | < 0.001 | 1.00 |
| * | -0.9897 | -0.4949 | 0.0816 | -6.07 | < 0.001 | 1.00 |
| * | 1.4174 | 0.7087 | 0.0816 | 8.69 | < 0.001 | 1.00 |

Regression Equation in Uncoded Units

| = -0.808 + 0.0106  + 3.43  - 0.1898 + 0.2099 |
| --- |


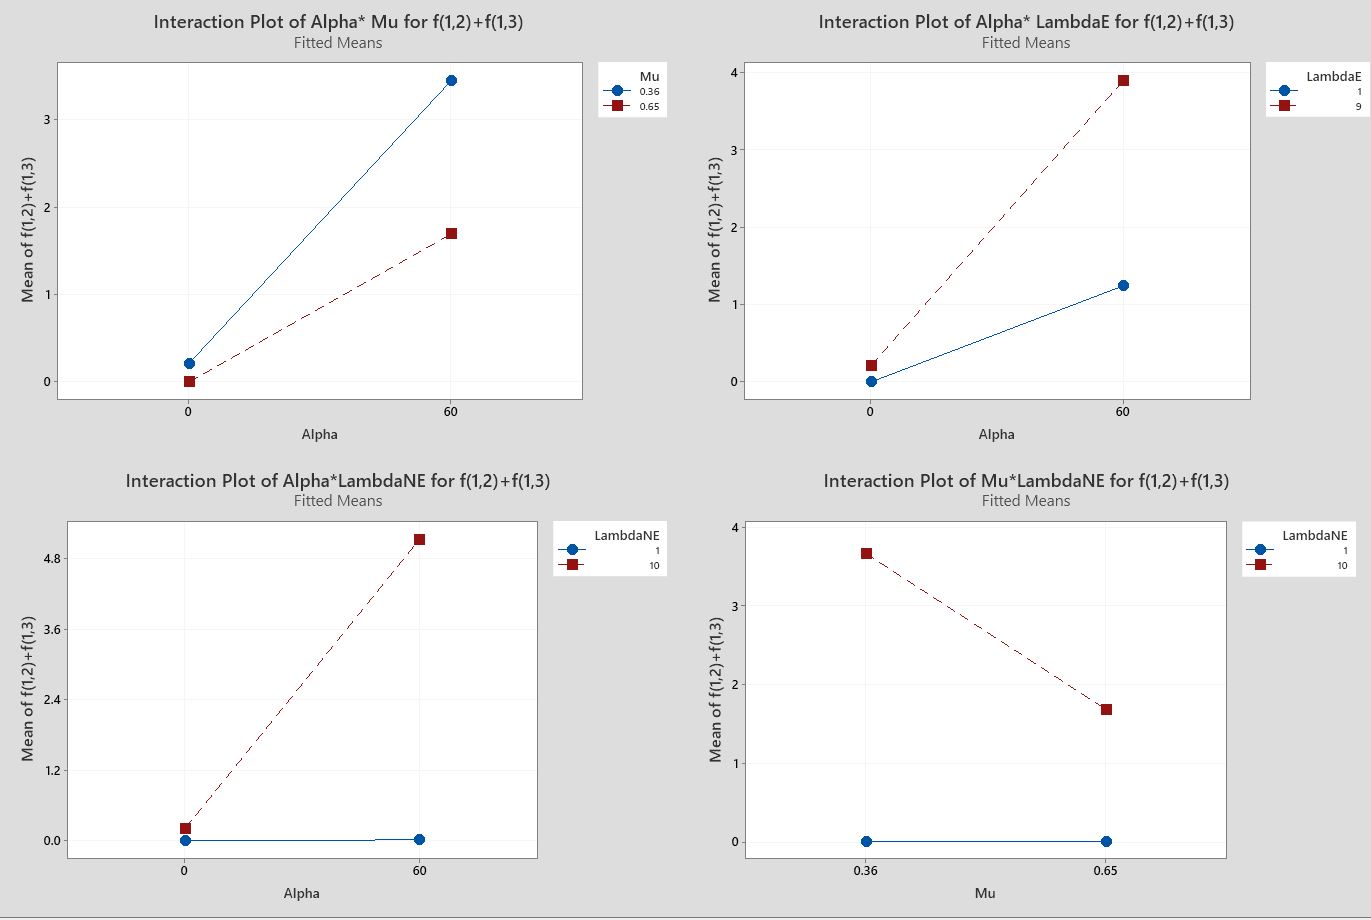

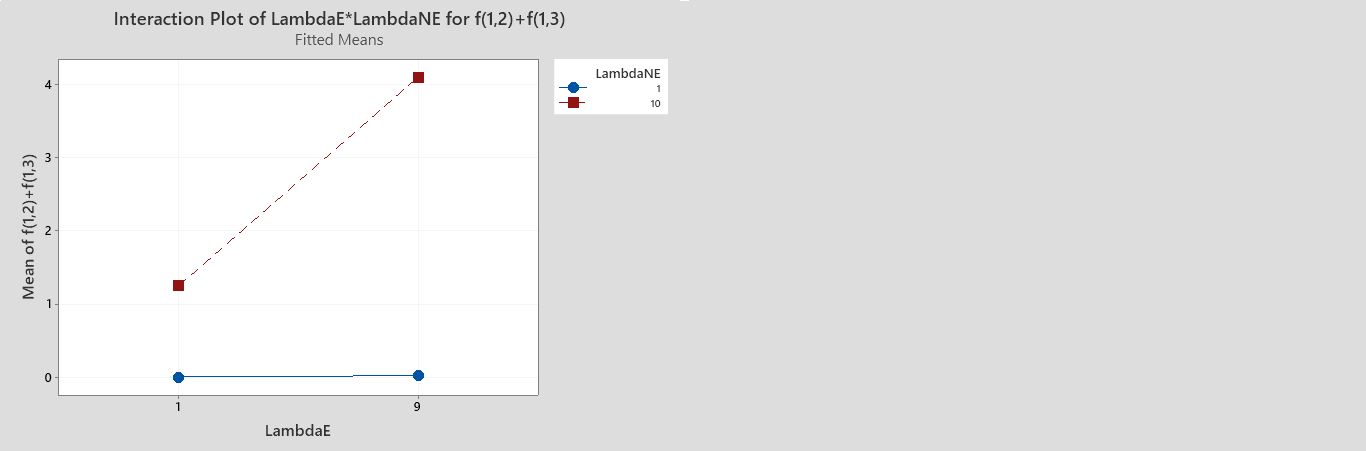


Figure D.7. Significant interaction plots for

**Response**

Model Summary

| S | R-sq | R-sq(adj) | R-sq(pred) |
| --- | --- | --- | --- |
| 0.960552 | 79.31% | 77.54% | 75.23% |

Coded Coefficients

| Term | Effect | Coef | SE Coef | T-Value | P-Value | VIF |
| --- | --- | --- | --- | --- | --- | --- |
| Constant |  | 2.3642 | 0.0849 | 27.85 | < 0.001 |  |
|  | -2.6216 | -1.3108 | 0.0849 | -15.44 | < 0.001 | 1.00 |
|  | 0.6784 | 0.3392 | 0.0849 | 4.00 | < 0.001 | 1.00 |
|  | -1.4609 | -0.7305 | 0.0849 | -8.60 | < 0.001 | 1.00 |
|  | -1.5391 | -0.7695 | 0.0849 | -9.06 | < 0.001 | 1.00 |
| * | -0.3716 | -0.1858 | 0.0849 | -2.19 | 0.031 | 1.00 |
| * | -0.4109 | -0.2055 | 0.0849 | -2.42 | 0.017 | 1.00 |
| * | -0.4891 | -0.2445 | 0.0849 | -2.88 | 0.005 | 1.00 |
| * | 0.4891 | 0.2445 | 0.0849 | 2.88 | 0.005 | 1.00 |
| * | 0.4109 | 0.2055 | 0.0849 | 2.42 | 0.017 | 1.00 |
| * | 0.3716 | 0.1858 | 0.0849 | 2.19 | 0.031 | 1.00 |

Regression Equation in Uncoded Units

|  | = 5.367 - 0.0036  - 0.22  - 0.4009  - 0.3273 - 0.0427 * - 0.001712 *  - 0.001811*+ 0.422 * + 0.315 *+ 0.01032 * |
| --- | --- |


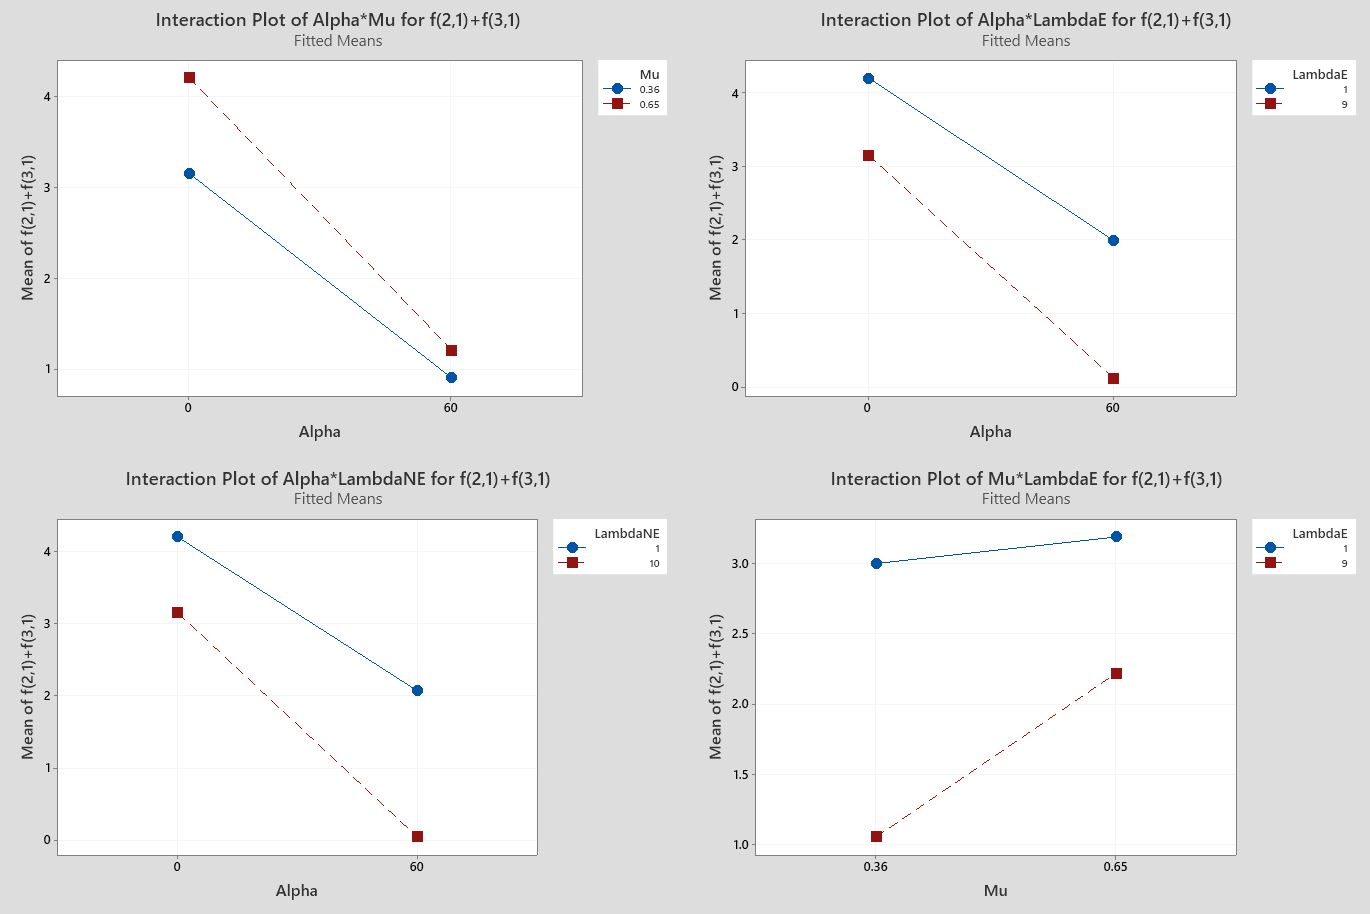

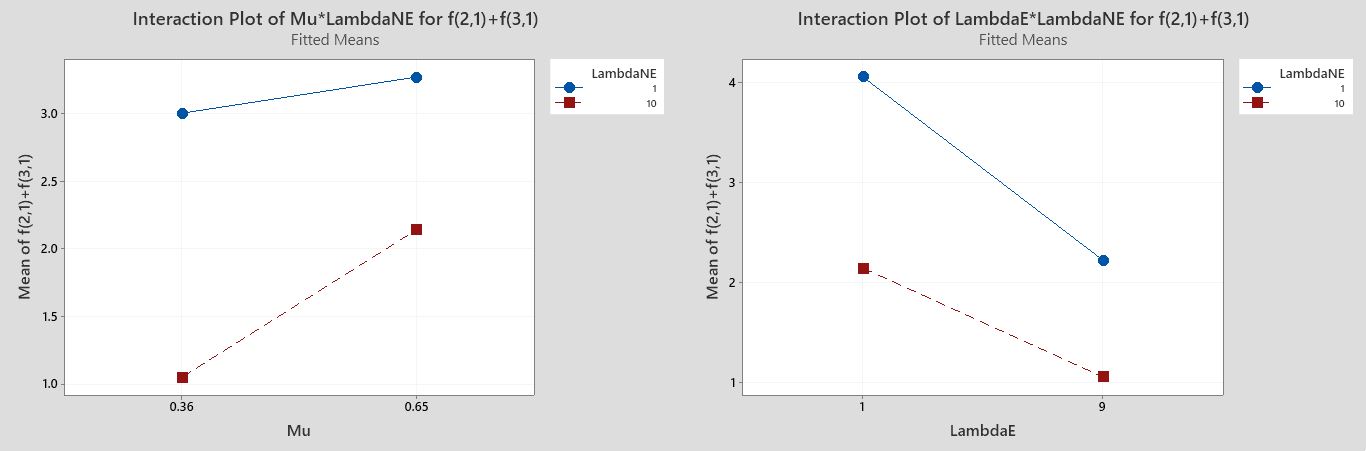


Figure D.8. Significant interaction plots for

1. + : Significance at p=0.05 level and positive effect

   ++: Significance at p=0.01 level and positive effect

   +++: Significance at p=0.001 level and positive effect

   - : Significance at p=0.05 level and negative effect

   --: Significance at p=0.01 level and negative effect

   ---: Significance at p=0.001 level and negative effect [↑](#footnote-ref-1)
